# Supplementary material for: Comparison of Differentiation Pattern and WNT/SHH Signaling in Pluripotent Stem Cells Cultured under Different Conditions
Source: MDPI journal article supplement (doi:10.3390/cells10102743), 2021-10-14
Supplement: s1 [file s1]

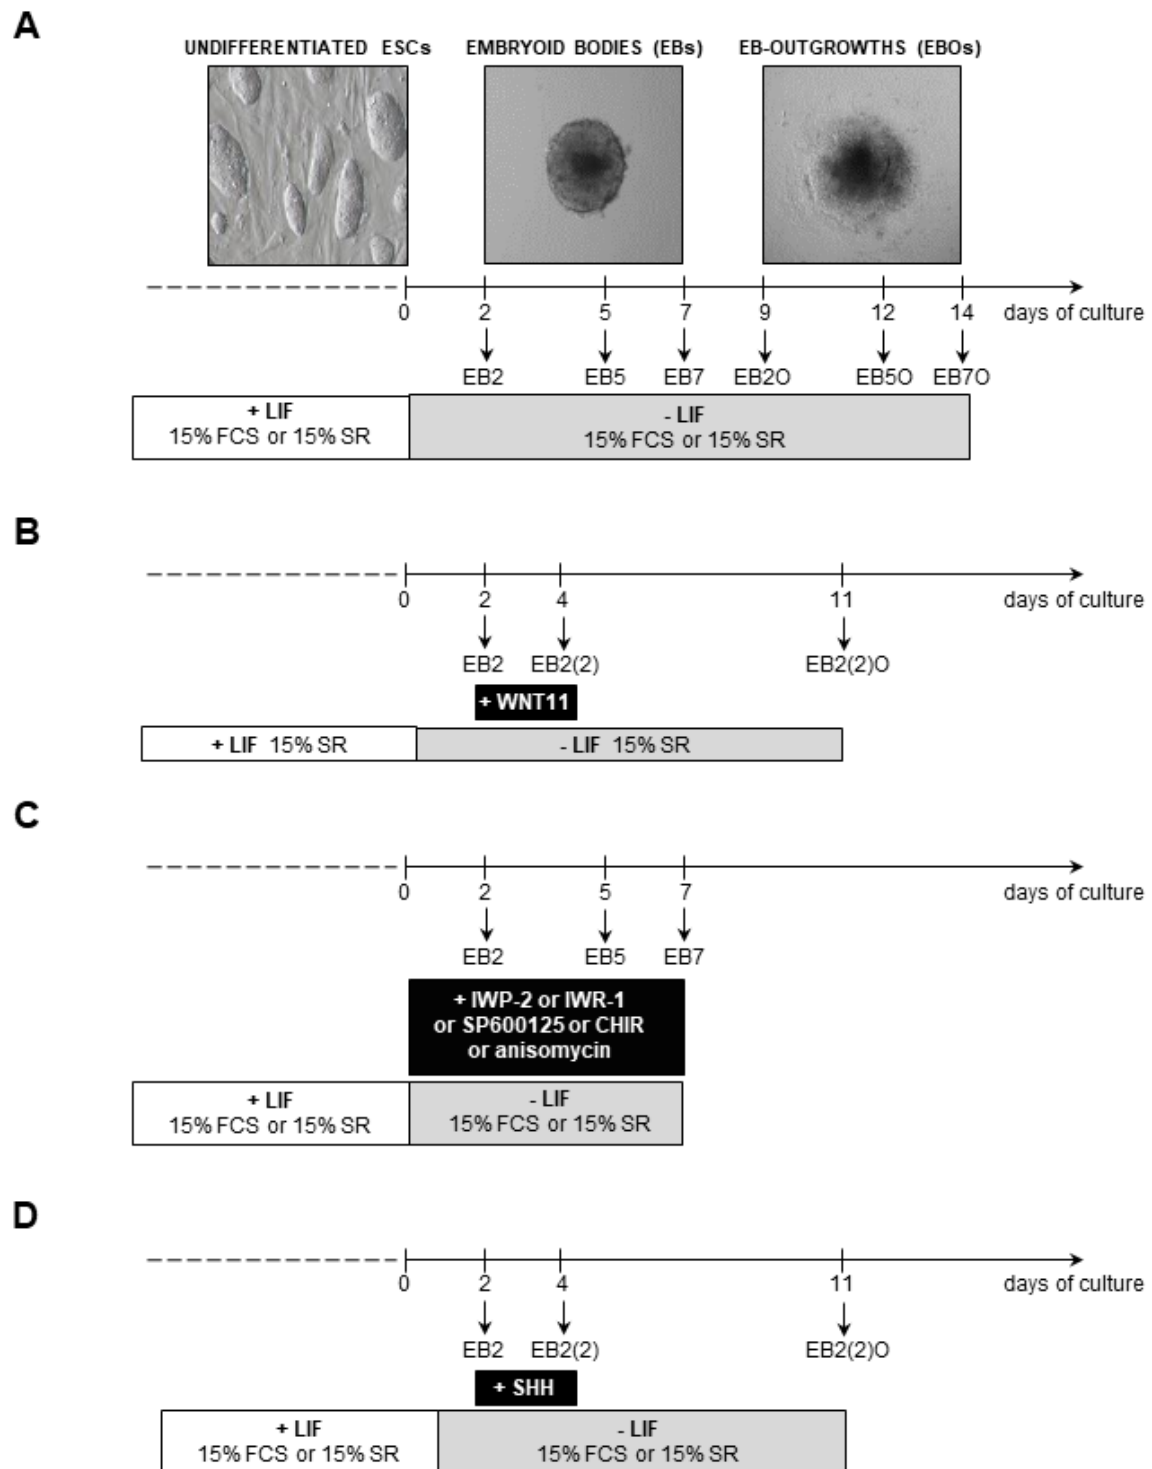

**Figure S1.** Outline of experiments.

**A**

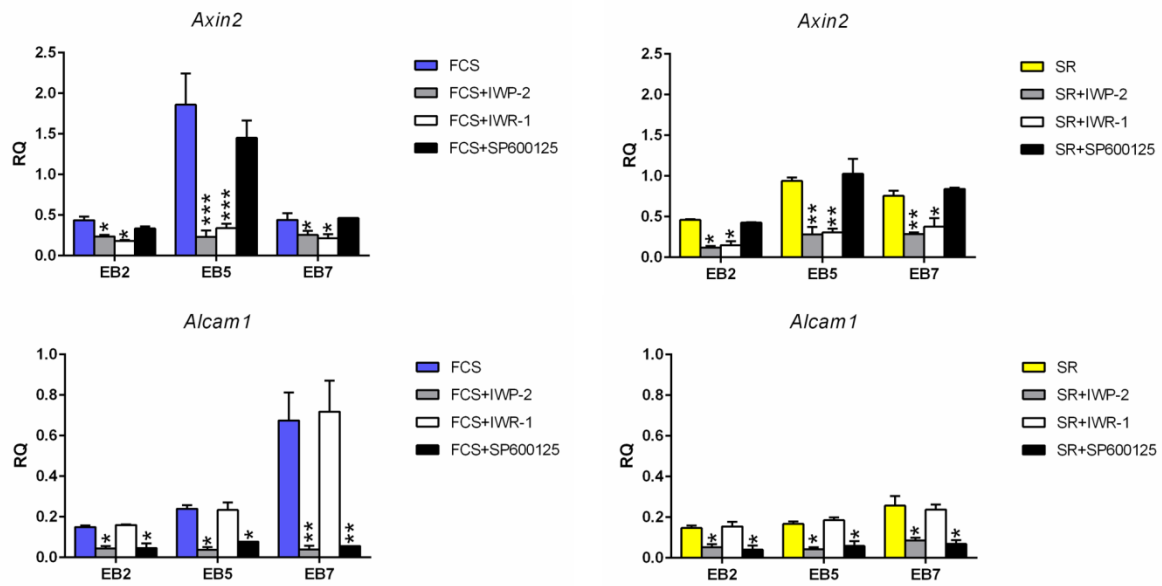

**B**

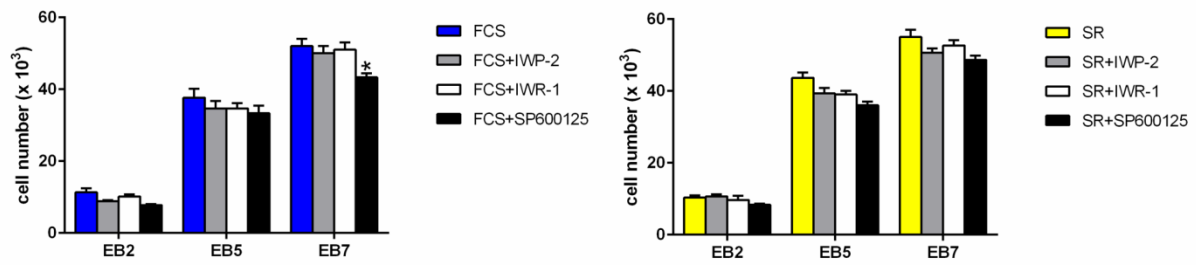

**C**

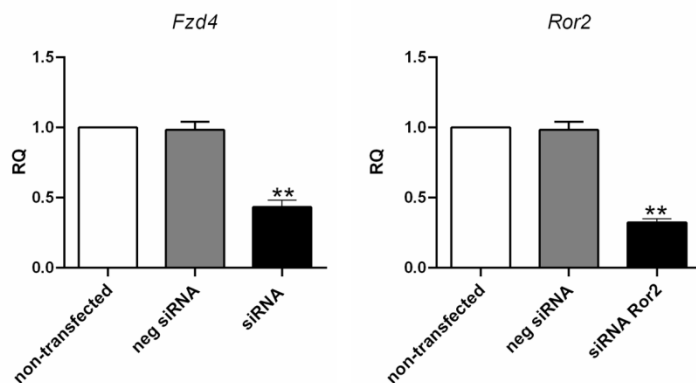

**Figure S2.** Influence of Wnt inhibitor or siRNA treatment on ESCs. (A) Expression of *Axin2* and *Alcam1*, targets of canonical and noncanonical Wnt pathways, in control EBs and EBs treated with indicated Wnt inhibitors. (B) Number of live cells counted after trypan blue staining building control EBs and EBs treated with indicated Wnt inhibitors. (C) Expression of *Fzd4* and *Ror2*, receptors for Wnt5a activating canonical and noncanonical Wnt pathway, in non-transfected or siRNA treated ECSs cultured in FCS. For A and C  $\beta$ -actin was used as a reference gene. RQ=1 for the expression level detected in 13.5-day old mouse embryo. Data presented as means of three independent experiments with standard deviations; \* $p$ <0.05; \*\* $p$ <0.01; \*\*\* $p$ <0.001; \*\*\*\* $p$ <0.0001.

**Table S1.** Taqman assays used in qPCR analyzes.

| <b>Gen</b>    | <b>Taqman Assay ID</b> | <b>Gen</b>    | <b>Taqman Assay ID</b> |
|---------------|------------------------|---------------|------------------------|
| <i>ActB</i>   | Mm01205647_g1          | <i>Axin2</i>  | Mm001443610_m1         |
| <i>Wnt1</i>   | Mm01300555_g1          | <i>Alcam1</i> | Mm00711623_m1          |
| <i>Wnt2a</i>  | Mm00470018_m1          | <i>Ror2</i>   | Mm00443470_m1          |
| <i>Wnt2b</i>  | Mm00437330_m1          | <i>Shh</i>    | Mm00436528_m1          |
| <i>Wnt3</i>   | Mm00437336_m1          | <i>Ptc1</i>   | Mm00436026_m1          |
| <i>Wnt3a</i>  | Mm00437337_m1          | <i>Ptc2</i>   | Mm00436047_m1          |
| <i>Wnt4</i>   | Mm01194003_m1          | <i>Ccnd1</i>  | Mm00432359_m1          |
| <i>Wnt5a</i>  | Mm00437347_m1          | <i>Gli1</i>   | Mm00494654_m1          |
| <i>Wnt5b</i>  | Mm01183986_m1          | <i>Nanog</i>  | Mm02019550_s1          |
| <i>Wnt6</i>   | Mm00437347_m1          | <i>Sox2</i>   | Mm03053810_s1          |
| <i>Wnt7a</i>  | Mm00437356_m1          | <i>Gata4</i>  | Mm00484689_m1          |
| <i>Wnt7b</i>  | Mm01301717_m1          | <i>Foxa2</i>  | Mm01976556_s1          |
| <i>Wnt8a</i>  | Mm01157914_g1          | <i>Pax6</i>   | Mm00443081_m1          |
| <i>Wnt8b</i>  | Mm00442108_g1          | <i>Tbxt</i>   | Mm01318252_m1          |
| <i>Wnt9a</i>  | Mm00460518_m1          | <i>Mixl1</i>  | Mm00489085_m1          |
| <i>Wnt9b</i>  | Mm00457102_m1          | <i>Msgn1</i>  | Mm00490407_s1          |
| <i>Wnt10a</i> | Mm00437325_m1          | <i>Afp</i>    | Mm00431715_m1          |
| <i>Wnt10b</i> | Mm00442104_m1          | <i>Dcx</i>    | Mm00438400_m1          |
| <i>Wnt11</i>  | Mm00437328_m1          | <i>Pdx1</i>   | Mm00435565_m1          |
| <i>Wnt16</i>  | Mm00446420_m1          | <i>TnnT2</i>  | Mm01290256_m1          |
| <i>Fzd5</i>   | Mm01261677_g1          | <i>Axin2</i>  | Mm001443610_m1         |
| <i>Fzd7</i>   | Mm00433409_s1          | <i>Alcam1</i> | Mm00711623_m1          |
